# Supplementary material for: A Ruthenium(ii) complex as a potential luminescent switch-on probe for G-quadruplex DNA
Source: Royal Society of Chemistry journal article supplement (doi:10.1039/c7ra01853c), 2017-01-01
Supplement: c7ra01853c1.pdf [file c7ra01853c1.pdf]

# **A Ruthenium(II) Complex as Potential luminescent Switch-on Probe on G-quadruplex DNA**

Li Li<sup>a</sup>, Hui-Min Liu<sup>b</sup>, Xu-Kui Liu<sup>a</sup>, Si-Yan Liao<sup>c</sup>, Yu-Tao Lan<sup>d</sup>, Qiong Wu<sup>a, \*</sup>, Xi-Cheng Wang<sup>b,\*</sup>, Qi Wang<sup>a</sup>, Shuang-Yan Zhang<sup>a</sup>, Wen-Jie Mei<sup>a, \*</sup>

*<sup>a</sup>School of Pharmacy, Guangdong Pharmaceutical University, Guangzhou, 510006,  
China, PRC*

*<sup>b</sup>The First Affiliation Hospital, Guangdong Pharmaceutical University, Guangzhou,  
510006, China, PRC*

*<sup>c</sup>School of Pharmacy, Guangzhou Medical University, Guangzhou, 510006, China,  
PRC*

*<sup>d</sup>School of Nursing, Guangdong Pharmaceutical University, Guangzhou, 510006,  
China, PRC*

\*Correspondence: [wenjiemei@126.com](mailto:wenjiemei@126.com), [wuqiongniu.1113@163.com](mailto:wuqiongniu.1113@163.com)

[13902400598@126.com](mailto:13902400598@126.com)

## Main contents

|                                                                                      |    |
|--------------------------------------------------------------------------------------|----|
| 1. The synthetic route of ruthenium(II) complexes .....                              | S1 |
| 2. The ESI-MS spectra .....                                                          | S2 |
| 3. The <sup>1</sup> H NMR spectra.....                                               | S3 |
| 4. The <sup>13</sup> C NMR spectra.....                                              | S4 |
| 5. The <sup>1</sup> H- <sup>1</sup> H COSY spectra.....                              | S5 |
| 6. Selectivity recognition of <i>c-myc</i> G-quadruplex DNA rather than CT-DNA ..... | S6 |
| 7. The expression of c-Myc regulated by ruthenium(II) complexes.....                 | S7 |
| 8. The AFM of <i>c-myc</i> G4 DNA and ruthenium(II) complexes alone .....            | S8 |

## 1. The synthetic route of 1 and 2

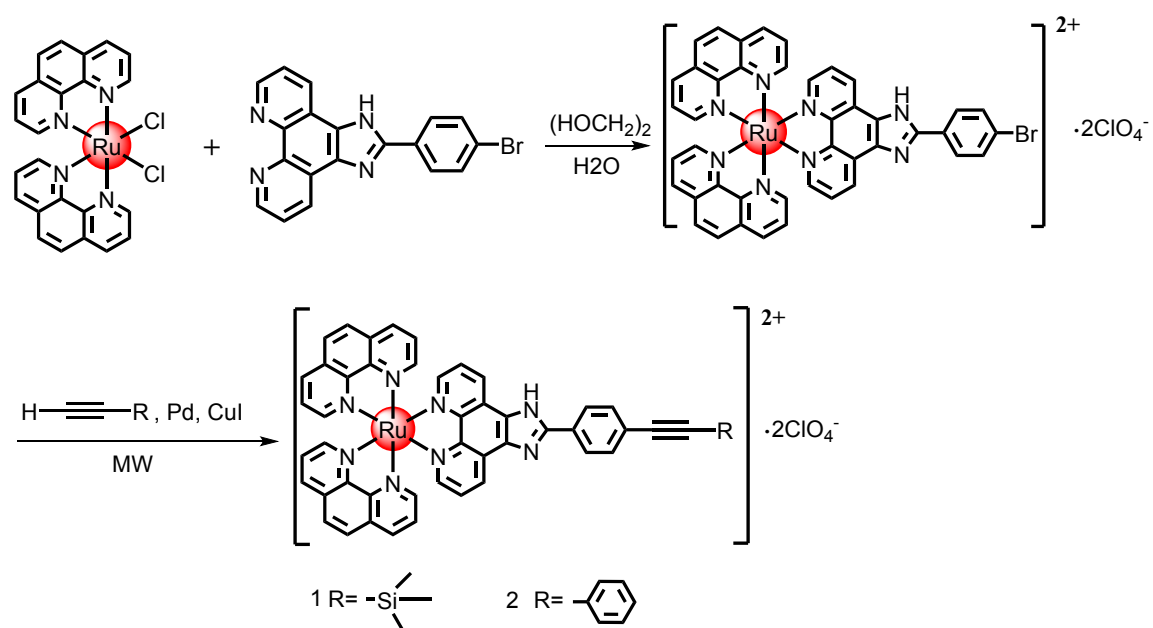

Fig. S1 Microwave-assisted synthesis route of 1 and 2.

## 2. The ESI-MS spectra of 1 and 2

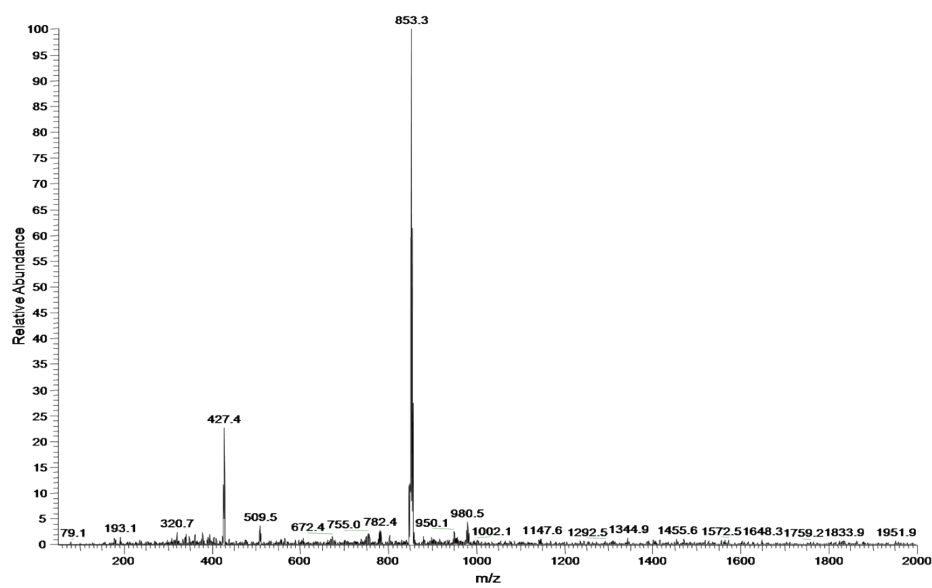

A

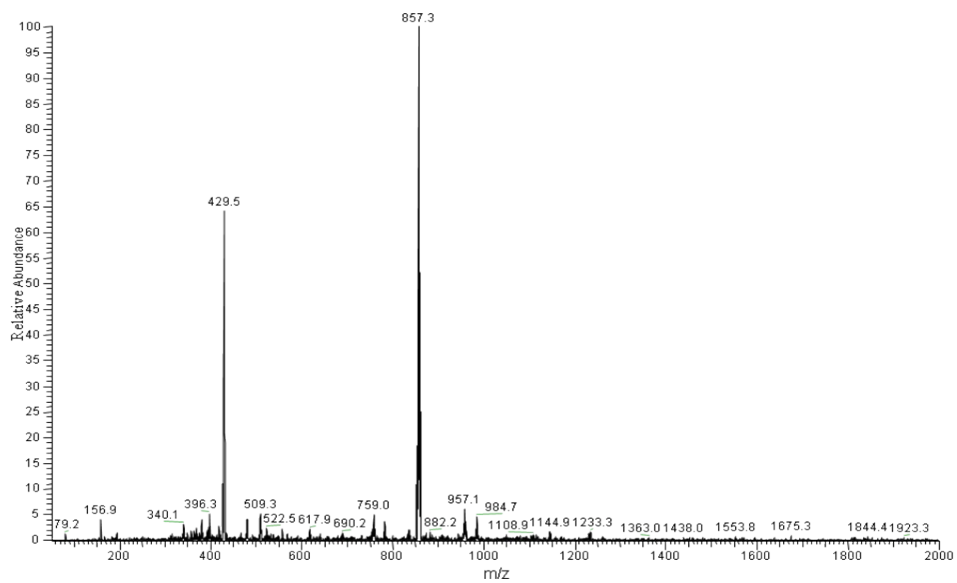

B

Fig. S2 The ESI-MS spectra of 1 (A) and 2 (B)

3. The  $^1\text{H}$  NMR spectra of 1 and 2

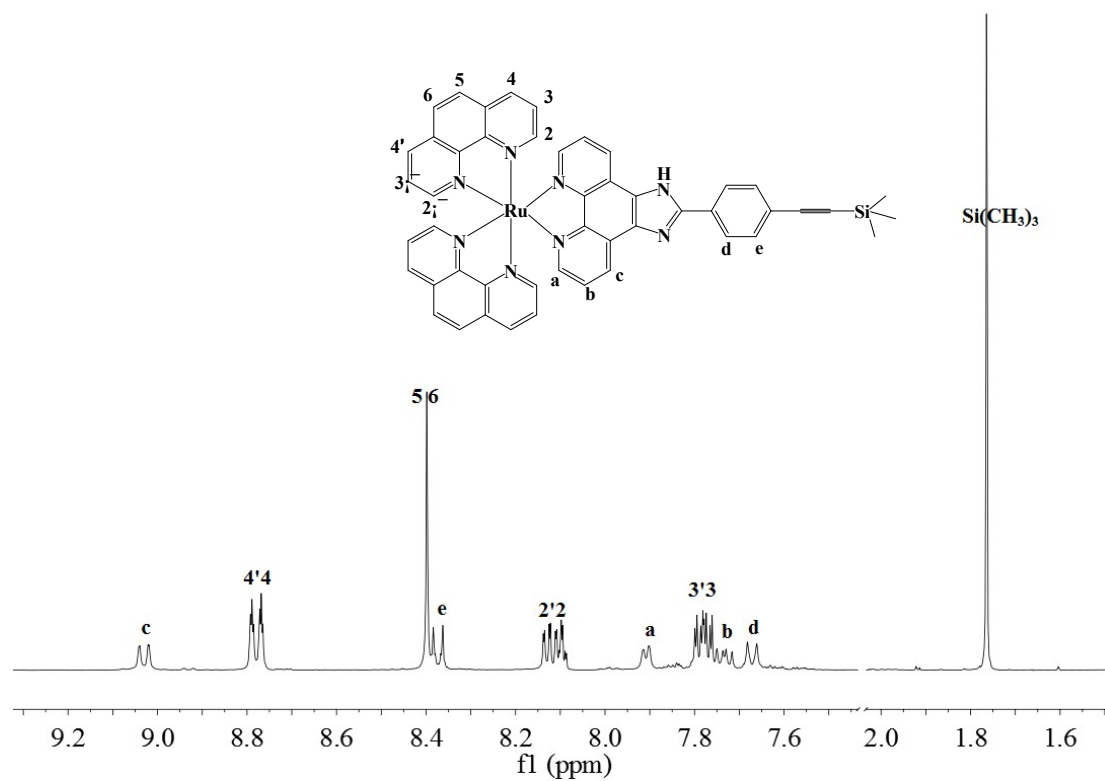

A

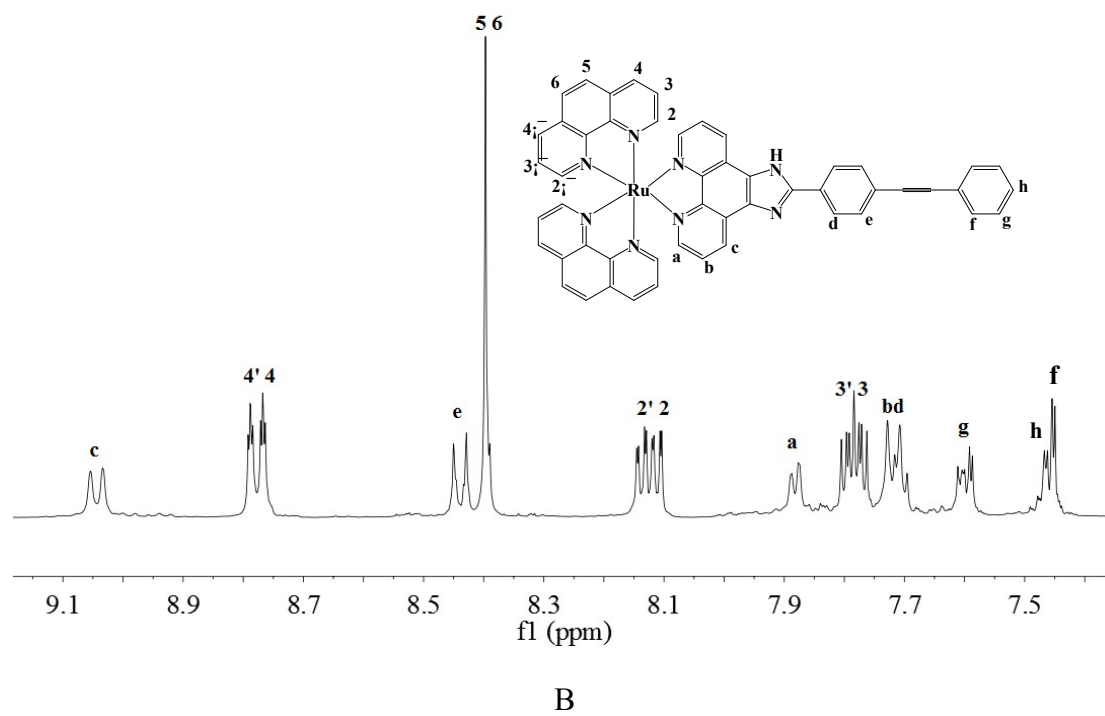

**Fig. S3** The  $^1\text{H}$  NMR spectra of **1** (A) and **2** (B)

4. The  $^{13}\text{C}$  NMR spectra of **1** and **2**

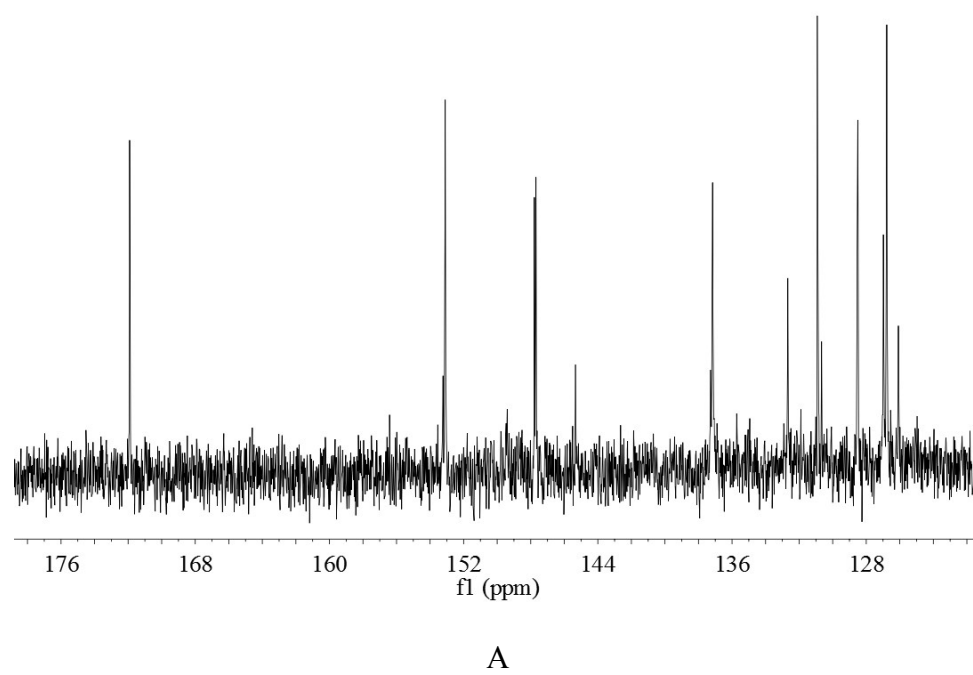

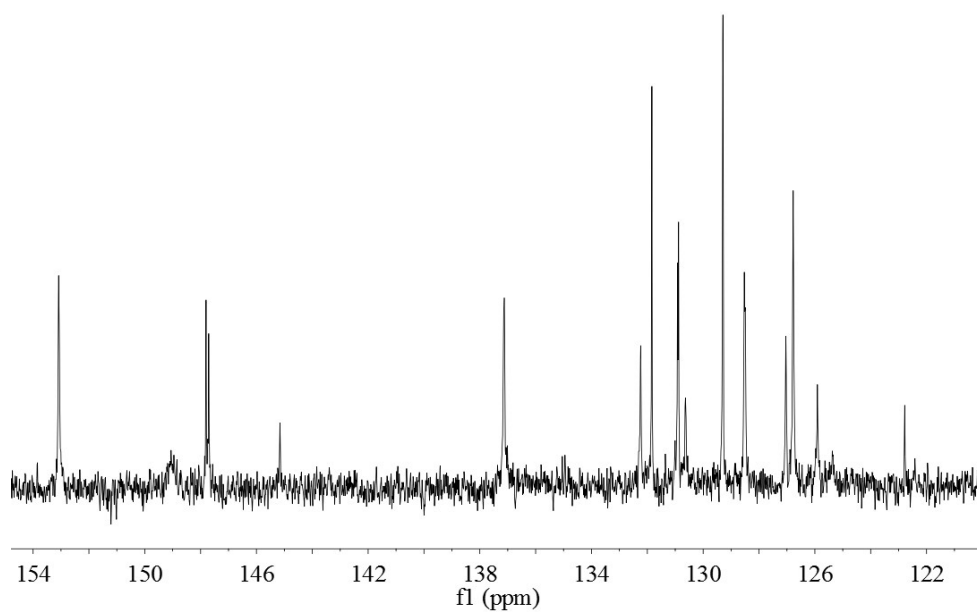

B

**Fig. S4** The  $^{13}\text{C}$  NMR spectra of **1** (A) and **2** (B)

*5. The  $^1\text{H}$ - $^1\text{H}$  COSY spectra of **1** and **2***

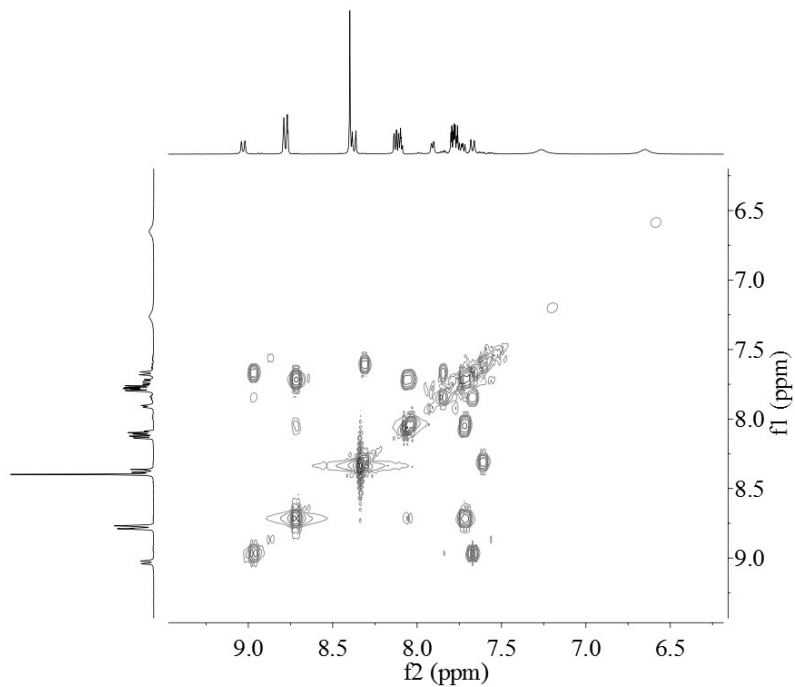

A

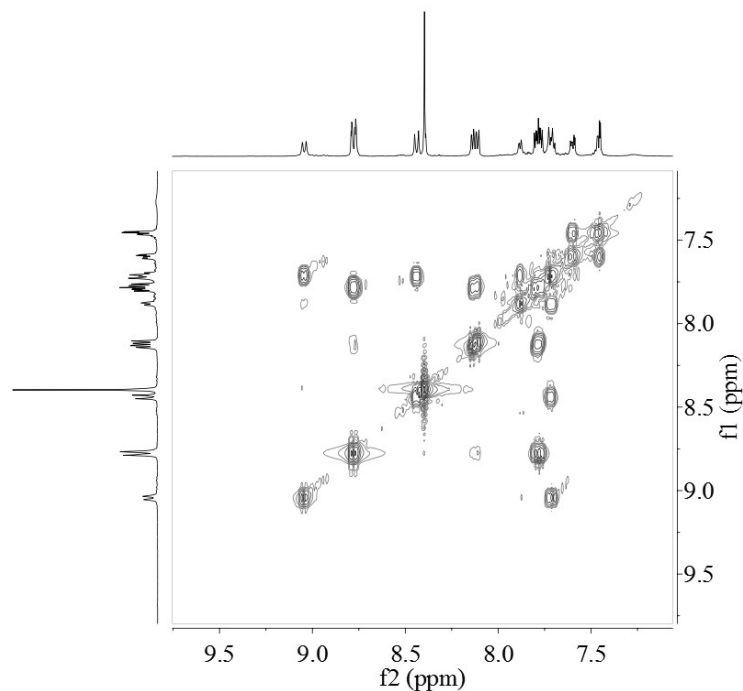

B

**Fig. S5** The  $^1\text{H}$ - $^1\text{H}$  COSY spectra of **1** (A) and **2** (B)

6. Selectivity recognition of *c-myc* G-quadruplex DNA rather than CT-DNA

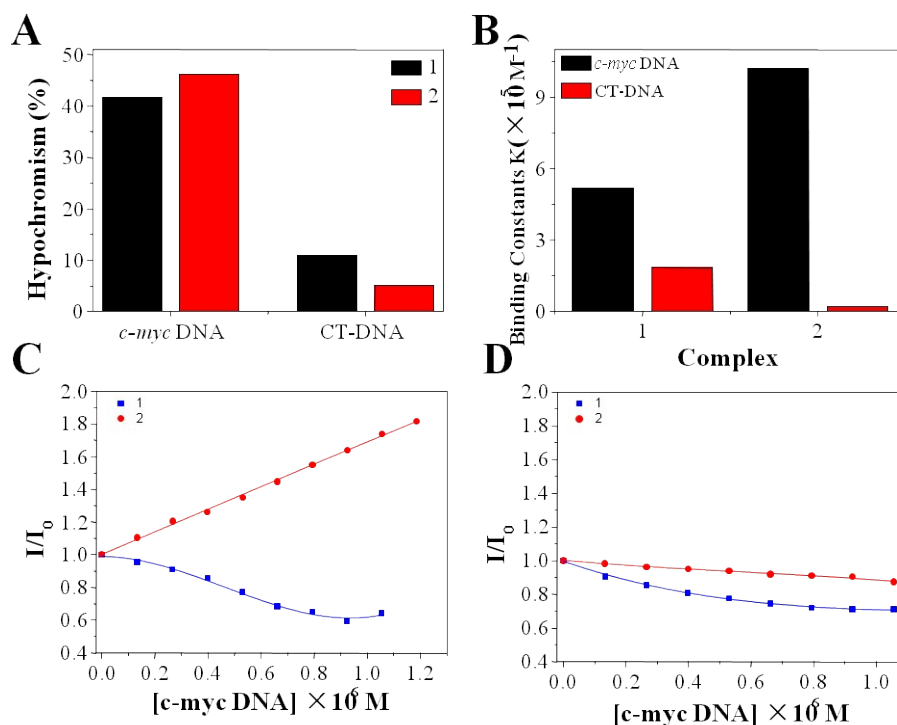

**Fig. S6** Both Ru(II) complexes **1** and **2** selectively bind to G-quadruplex DNA rather than to double-strand CT-DNA. (A) The hypochromic effect of **1** and **2** changed between *c-myc* and CT-DNA; (B) the DNA-binding constant of **1** and **2** interacted with *c-myc* and CT-DNA by electronic

spectra; (C) the fluorescence intensity of **1** and **2** changed with the increase in *c-myc* (C) and CT-DNA (D).

### 7. The expression of *c-Myc* regulated by **1** and **2**

Western blot analysis was used to investigate the *c-Myc* expression in **1** and **2** treated MDA-MB-231 cells. As shown in Fig. S7, the treatment of cells with complex **1** and **2** at the different concentrations notably down-regulated *c-Myc* expression in a dose-dependent manner. The results suggest that Ru(II) complexes may decrease *c-Myc* expression through the stabilization of the *c-Myc* oncogene G4-DNA in the promoter region, especially for **2**, exhibited greater inhibition of *c-Myc* expression than **1**, which was agreement with the above spectroscopic analysis. These results indicated that this class of Ru(II) complex can bind to *c-myc* G-quadruplex DNA and block its expression.

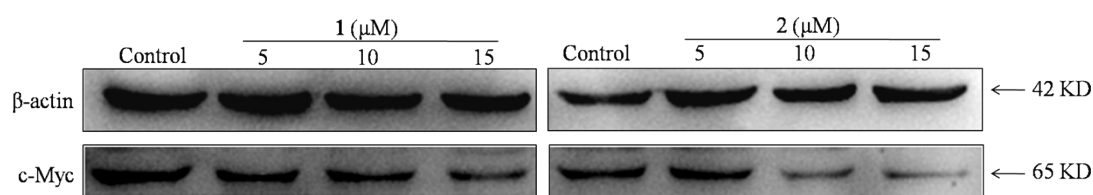

**Fig. S7** The ruthenium(II) complexes **1** and **2** (0, 5, 10 and 20  $\mu$ M) blocked the expression of *c-myc* in MDA-MB-231 cells.

### 8. The AFM of free *c-myc* G4 DNA and ruthenium(II) complexes alone

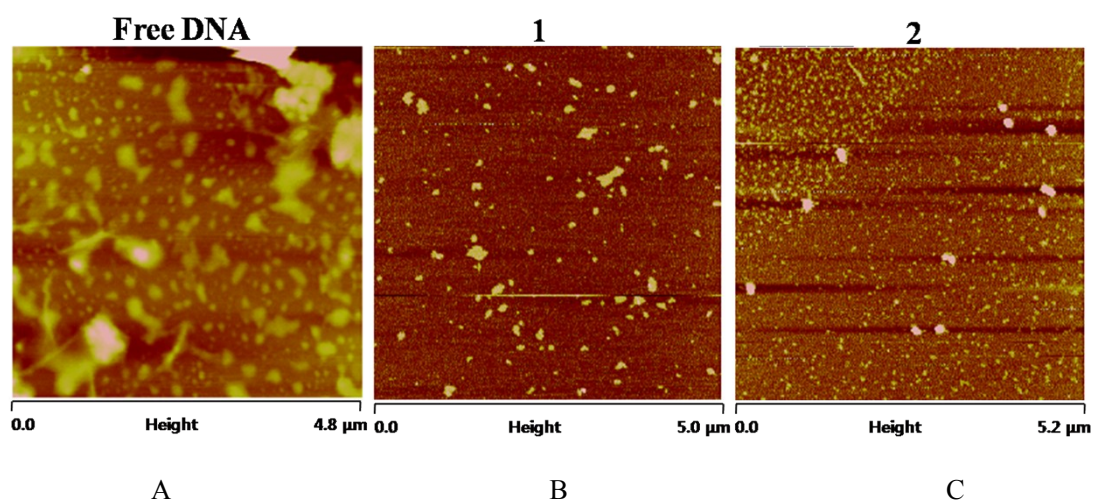

**Fig. S8** (A) The AFM image of *c-myc* DNA (100  $\mu$ M) in the absence of Ru(II) complexes. (B) The AFM image of **1** (100  $\mu$ M). (C) The AFM image of **2** (100  $\mu$ M).
